# Supplementary material for: Simultaneous detection of trace As, Hg, Tl, and Pb in biological tissues using monochromatic excitation X-ray fluorescence spectrometry
Source: Royal Society of Chemistry journal article supplement (doi:10.1039/d3ja00127j), 2023-01-01
Supplement: d3ja00127j1.pdf [file d3ja00127j1.pdf]

## Supplementary Material

Simultaneous detection of trace As, Hg, Tl, and Pb in biological tissues  
using monochromatic excitation X-ray fluorescence spectrometry

Shihao Wu,<sup>‡a,b</sup> Linpei Dong,<sup>‡b</sup> Jiahua Ji,<sup>a,b</sup> Peng Zhao,<sup>b</sup> Ge Song,<sup>b</sup> Xiaojun Wu,<sup>b</sup> Jifen Wang,<sup>a</sup> Yunfeng Zhang<sup>\*b</sup> and Jingjing Wang<sup>c</sup>

- a. *School of Investigation, People's Public Security University of China, Beijing 100038, China.*
- b. *Institute of Forensic Science, Ministry of Public Security, Beijing 100038, China.*
- c. *Suzhou Jia Pu Technology Co., Ltd., Suzhou 215000, China.*

*\*Corresponding author*

*E-mail: yunfeng\_2002@sohu.com*

*‡These authors contributed equally to this work*

---

## Contents

Figure S1 Original X-ray fluorescence spectrum

Table S1 The concentrations of each element at each sampling point in the homogeneity test

Table S2 The counting rates of each element in samples with concentration of  $10 \mu\text{g g}^{-1}$  at different moisture contents

Table S3 The counting rates of each element at different sample weight

Table S4 The measured values of each element at different measurement times at a concentration of  $0.5 \mu\text{g g}^{-1}$

Table S5 The measured values of each element at different measurement times at a concentration of  $10 \mu\text{g g}^{-1}$

Table S6 The measured values of each element at different measurement times at a concentration of  $100 \mu\text{g g}^{-1}$

Table S7 The measured values of each element under different substrates at a concentration of  $0.5 \mu\text{g g}^{-1}$

Table S8 The measured values of each element under different substrates at a concentration of  $10 \mu\text{g g}^{-1}$

Table S9 The measured values of each element under different substrates at a concentration of  $100 \mu\text{g g}^{-1}$

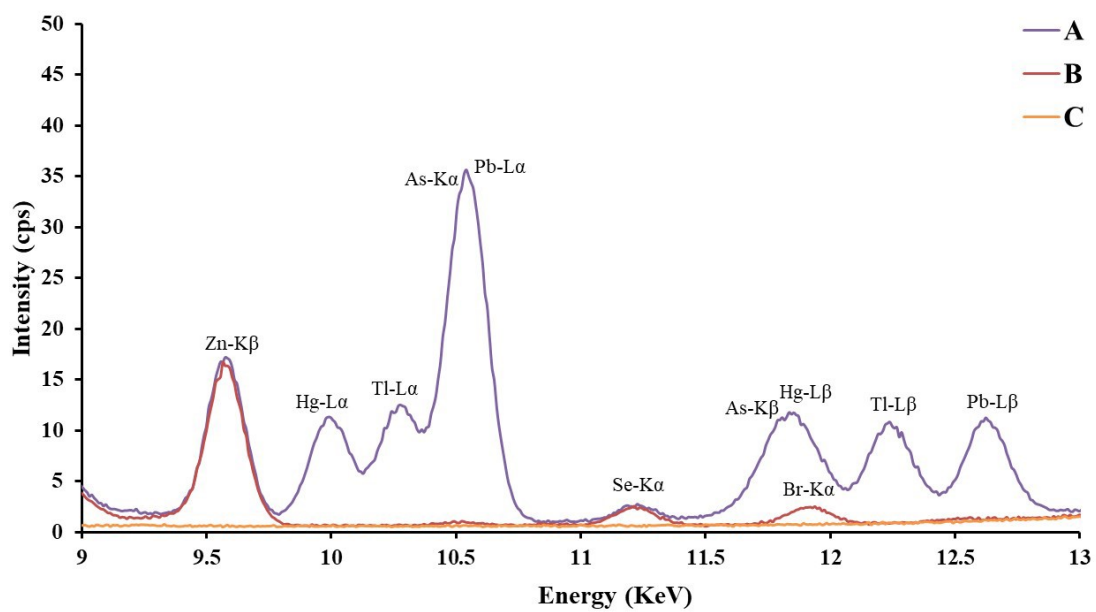

Figure S1 Original X-ray fluorescence spectrum: (A) a spiked tissue sample with 10 ppm of HMs; (B) a tissue sample blank without HMs; (C) a blank spectrum.

Table S1 The concentrations of each element at each sampling point in the homogeneity test

| Sampling point number | Concentration ( $\mu\text{g g}^{-1}$ ) |       |      |       |
|-----------------------|----------------------------------------|-------|------|-------|
|                       | As                                     | Hg    | Tl   | Pb    |
| 1                     | 10.04                                  | 10.77 | 9.82 | 10.37 |
| 1                     | 10.04                                  | 10.43 | 9.83 | 10.41 |
| 2                     | 9.96                                   | 10.25 | 9.80 | 10.34 |
| 2                     | 9.92                                   | 10.26 | 9.69 | 10.29 |
| 3                     | 10.09                                  | 10.41 | 9.81 | 10.25 |
| 3                     | 10.00                                  | 10.40 | 9.58 | 10.35 |
| 4                     | 10.06                                  | 10.26 | 9.71 | 10.31 |
| 4                     | 10.12                                  | 10.58 | 9.71 | 10.15 |
| 5                     | 10.21                                  | 10.44 | 9.93 | 10.21 |
| 5                     | 10.12                                  | 10.50 | 9.86 | 10.37 |
| 6                     | 10.15                                  | 10.31 | 9.60 | 10.31 |
| 6                     | 9.92                                   | 10.32 | 9.73 | 10.43 |
| 7                     | 9.96                                   | 10.41 | 9.69 | 10.45 |
| 7                     | 10.08                                  | 10.54 | 9.71 | 10.39 |
| 8                     | 9.92                                   | 10.29 | 9.72 | 10.46 |
| 8                     | 9.99                                   | 10.73 | 9.57 | 10.54 |
| 9                     | 9.96                                   | 10.65 | 9.53 | 10.35 |
| 9                     | 10.04                                  | 10.65 | 9.65 | 10.32 |
| 10                    | 10.03                                  | 10.41 | 9.48 | 10.29 |
| 10                    | 9.86                                   | 10.67 | 9.81 | 10.51 |

Table S2 The effective counting rates (100 s) of each element in samples with concentration of 10  $\mu\text{g g}^{-1}$  at different moisture contents

| Moisture content (%) | Counting rates (100 s) |          |          |          |
|----------------------|------------------------|----------|----------|----------|
|                      | As                     | Hg       | Tl       | Pb       |
| 100                  | 33746.97               | 21439.55 | 22733.17 | 23316.83 |
|                      | 33464.87               | 20540.10 | 21965.90 | 23558.57 |
|                      | 34723.70               | 21352.97 | 23894.87 | 23479.10 |
| 90                   | 34377.10               | 20891.95 | 23090.93 | 23784.87 |
|                      | 33359.60               | 20482.70 | 22228.13 | 23951.30 |
|                      | 35677.85               | 21900.13 | 24159.47 | 22459.90 |
| 80                   | 33475.93               | 20928.73 | 22256.50 | 22770.90 |
|                      | 33417.83               | 20713.45 | 22033.33 | 23405.45 |
|                      | 34323.30               | 20531.75 | 22497.90 | 22678.60 |
| 70                   | 33539.90               | 21519.57 | 22053.10 | 23378.80 |
|                      | 33768.57               | 20947.70 | 22010.00 | 23135.00 |
|                      | 34301.80               | 20269.95 | 23931.35 | 23631.90 |
| 60                   | 34007.10               | 21118.75 | 22638.87 | 22176.03 |
|                      | 34873.25               | 21117.05 | 22592.95 | 23927.60 |
|                      | 34293.20               | 20772.50 | 22509.20 | 23370.40 |
| 50                   | 33459.10               | 20987.20 | 21720.70 | 22656.50 |
|                      | 35463.20               | 21608.70 | 23713.77 | 23714.80 |
|                      | 34536.35               | 21537.30 | 23103.90 | 22259.20 |

Table S3 The effective counting rates (100 s) of each element at different sample weight

| Concentration ( $\mu\text{g g}^{-1}$ ) | Sample weight (g) | Counting rates (100 s) |           |           |           |
|----------------------------------------|-------------------|------------------------|-----------|-----------|-----------|
|                                        |                   | AS                     | Hg        | Tl        | Pb        |
| 0.5                                    | 0.1               | 1425.62                | 970.57    | 1040.98   | 1086.02   |
|                                        | 0.2               | 1700.95                | 1093.20   | 1101.08   | 1163.88   |
|                                        | 0.3               | 1832.93                | 1150.09   | 1219.45   | 1201.44   |
|                                        | 0.4               | 1840.77                | 1145.55   | 1226.76   | 1194.52   |
|                                        | 0.5               | 1891.90                | 1147.38   | 1244.18   | 1180.80   |
|                                        | 0.6               | 1852.04                | 1130.90   | 1213.24   | 1194.92   |
| 10                                     | 0.1               | 22981.37               | 13775.77  | 15547.05  | 14688.50  |
|                                        | 0.2               | 31892.70               | 18481.23  | 21045.20  | 20638.77  |
|                                        | 0.3               | 35328.27               | 20348.63  | 22838.77  | 23102.53  |
|                                        | 0.4               | 35366.20               | 20767.60  | 23298.57  | 23242.67  |
|                                        | 0.5               | 35733.00               | 20598.45  | 23283.57  | 23477.00  |
|                                        | 0.6               | 35366.20               | 20826.00  | 23681.30  | 23559.40  |
| 100                                    | 0.1               | 241274.00              | 137124.00 | 154733.67 | 143984.67 |
|                                        | 0.2               | 323084.00              | 187570.67 | 223681.33 | 182286.67 |
|                                        | 0.3               | 335683.67              | 217531.50 | 230509.50 | 244614.67 |
|                                        | 0.4               | 328818.33              | 217927.00 | 226820.00 | 245336.00 |
|                                        | 0.5               | 332519.00              | 215054.00 | 231326.00 | 249154.67 |
|                                        | 0.6               | 332515.00              | 220078.00 | 230177.50 | 250076.00 |

Table S4 The measured values of each element at different measurement times at a concentration of 0.5  $\mu\text{g g}^{-1}$

| Element | Serial number | Measured values ( $\mu\text{g g}^{-1}$ ) |        |         |         |
|---------|---------------|------------------------------------------|--------|---------|---------|
|         |               | 30 (s)                                   | 60 (s) | 100 (s) | 200 (s) |
| As      | 1             | 0.59                                     | 0.52   | 0.58    | 0.55    |
|         | 2             | 0.48                                     | 0.57   | 0.56    | 0.55    |
|         | 3             | 0.53                                     | 0.54   | 0.55    | 0.53    |
|         | 4             | 0.53                                     | 0.52   | 0.53    | 0.56    |
|         | 5             | 0.52                                     | 0.55   | 0.56    | 0.55    |
|         | 6             | 0.51                                     | 0.53   | 0.53    | 0.54    |
|         | 7             | 0.62                                     | 0.55   | 0.53    | 0.56    |
| Hg      | 1             | 0.47                                     | 0.46   | 0.49    | 0.51    |
|         | 2             | 0.47                                     | 0.48   | 0.50    | 0.53    |
|         | 3             | 0.49                                     | 0.50   | 0.51    | 0.51    |
|         | 4             | 0.50                                     | 0.49   | 0.50    | 0.53    |
|         | 5             | 0.50                                     | 0.47   | 0.49    | 0.49    |
|         | 6             | 0.47                                     | 0.49   | 0.53    | 0.51    |
|         | 7             | 0.44                                     | 0.52   | 0.51    | 0.50    |
| Tl      | 1             | 0.45                                     | 0.44   | 0.47    | 0.47    |
|         | 2             | 0.53                                     | 0.46   | 0.50    | 0.48    |
|         | 3             | 0.47                                     | 0.53   | 0.48    | 0.49    |
|         | 4             | 0.57                                     | 0.50   | 0.45    | 0.46    |
|         | 5             | 0.58                                     | 0.46   | 0.44    | 0.47    |
|         | 6             | 0.46                                     | 0.51   | 0.50    | 0.47    |
|         | 7             | 0.44                                     | 0.50   | 0.49    | 0.47    |
| Pb      | 1             | 0.55                                     | 0.56   | 0.56    | 0.56    |
|         | 2             | 0.59                                     | 0.55   | 0.59    | 0.59    |
|         | 3             | 0.57                                     | 0.61   | 0.58    | 0.63    |
|         | 4             | 0.59                                     | 0.61   | 0.62    | 0.59    |
|         | 5             | 0.62                                     | 0.53   | 0.55    | 0.54    |
|         | 6             | 0.57                                     | 0.62   | 0.62    | 0.59    |
|         | 7             | 0.46                                     | 0.59   | 0.58    | 0.57    |

Table S5 The measured values of each element at different measurement times at a concentration of 10  $\mu\text{g g}^{-1}$

| Element | Serial number | Measured values ( $\mu\text{g g}^{-1}$ ) |        |         |         |
|---------|---------------|------------------------------------------|--------|---------|---------|
|         |               | 30 (s)                                   | 60 (s) | 100 (s) | 200 (s) |
| As      | 1             | 10.23                                    | 10.52  | 10.45   | 10.32   |
|         | 2             | 10.49                                    | 10.62  | 10.35   | 10.40   |
|         | 3             | 10.34                                    | 10.50  | 10.35   | 10.34   |
|         | 4             | 10.23                                    | 10.42  | 10.35   | 10.34   |
|         | 5             | 10.37                                    | 10.53  | 10.38   | 10.33   |
|         | 6             | 10.38                                    | 10.61  | 10.40   | 10.43   |
|         | 7             | 10.28                                    | 10.40  | 10.41   | 10.36   |
| Hg      | 1             | 10.38                                    | 10.16  | 10.37   | 9.97    |
|         | 2             | 10.80                                    | 10.09  | 10.27   | 10.05   |
|         | 3             | 10.49                                    | 10.05  | 10.24   | 9.99    |
|         | 4             | 10.52                                    | 9.86   | 10.22   | 10.05   |
|         | 5             | 10.48                                    | 10.02  | 10.20   | 9.93    |
|         | 6             | 10.85                                    | 10.00  | 10.35   | 10.09   |
|         | 7             | 10.38                                    | 10.01  | 10.31   | 9.89    |
| Tl      | 1             | 10.32                                    | 10.33  | 10.42   | 10.26   |
|         | 2             | 10.28                                    | 10.13  | 10.36   | 10.34   |
|         | 3             | 10.47                                    | 10.43  | 10.46   | 10.17   |
|         | 4             | 10.33                                    | 10.33  | 10.50   | 10.38   |
|         | 5             | 10.31                                    | 10.34  | 10.37   | 10.24   |
|         | 6             | 10.55                                    | 10.43  | 10.39   | 10.37   |
|         | 7             | 10.58                                    | 10.49  | 10.38   | 10.31   |
| Pb      | 1             | 10.17                                    | 10.36  | 10.53   | 9.88    |
|         | 2             | 10.54                                    | 10.17  | 10.52   | 9.81    |
|         | 3             | 10.59                                    | 10.29  | 10.64   | 9.83    |
|         | 4             | 10.33                                    | 10.21  | 10.79   | 9.77    |
|         | 5             | 10.47                                    | 10.32  | 10.45   | 9.83    |
|         | 6             | 10.55                                    | 10.40  | 10.47   | 9.75    |
|         | 7             | 10.45                                    | 10.12  | 10.66   | 9.62    |



Table S6 The measured values of each element at different measurement times at a concentration of 100  $\mu\text{g g}^{-1}$

| Element | Serial number | Measured values ( $\mu\text{g g}^{-1}$ ) |        |         |         |
|---------|---------------|------------------------------------------|--------|---------|---------|
|         |               | 30 (s)                                   | 60 (s) | 100 (s) | 200 (s) |
| As      | 1             | 100.86                                   | 101.47 | 100.86  | 100.86  |
|         | 2             | 101.21                                   | 101.81 | 100.86  | 100.60  |
|         | 3             | 101.55                                   | 101.21 | 100.09  | 100.52  |
|         | 4             | 101.29                                   | 101.55 | 100.86  | 100.60  |
|         | 5             | 99.83                                    | 101.81 | 101.03  | 100.34  |
|         | 6             | 100.26                                   | 101.38 | 100.78  | 100.69  |
|         | 7             | 100.60                                   | 101.29 | 101.03  | 100.78  |
| Hg      | 1             | 102.54                                   | 103.69 | 107.00  | 109.08  |
|         | 2             | 102.62                                   | 103.92 | 106.77  | 109.46  |
|         | 3             | 102.31                                   | 104.23 | 107.08  | 108.85  |
|         | 4             | 102.54                                   | 104.31 | 107.00  | 109.69  |
|         | 5             | 102.92                                   | 104.62 | 106.54  | 109.54  |
|         | 6             | 102.15                                   | 104.31 | 106.77  | 109.92  |
|         | 7             | 102.77                                   | 104.00 | 107.38  | 109.15  |
| Tl      | 1             | 109.80                                   | 111.10 | 109.50  | 108.20  |
|         | 2             | 109.60                                   | 110.10 | 109.30  | 108.00  |
|         | 3             | 110.20                                   | 111.10 | 110.20  | 108.40  |
|         | 4             | 110.50                                   | 111.00 | 109.90  | 108.20  |
|         | 5             | 109.70                                   | 110.70 | 109.30  | 107.90  |
|         | 6             | 109.90                                   | 110.80 | 109.20  | 108.50  |
|         | 7             | 110.50                                   | 110.80 | 109.20  | 108.70  |
| Pb      | 1             | 104.08                                   | 106.23 | 105.69  | 101.00  |
|         | 2             | 104.85                                   | 106.00 | 105.62  | 100.93  |
|         | 3             | 104.38                                   | 106.69 | 106.00  | 101.00  |
|         | 4             | 104.15                                   | 106.00 | 105.54  | 101.00  |
|         | 5             | 105.69                                   | 106.15 | 105.54  | 101.20  |
|         | 6             | 104.77                                   | 106.23 | 105.46  | 100.87  |
|         | 7             | 103.92                                   | 106.15 | 105.23  | 101.07  |

Table S7 The measured values of each element under different substrates at a concentration of 0.5  $\mu\text{g g}^{-1}$

| Substrate  | Serial number | Measured values ( $\mu\text{g g}^{-1}$ ) |      |      |      |
|------------|---------------|------------------------------------------|------|------|------|
|            |               | As                                       | Hg   | Tl   | Pb   |
| Pig liver  | 1             | 0.44                                     | 0.47 | 0.46 | 0.48 |
|            | 2             | 0.47                                     | 0.49 | 0.46 | 0.47 |
|            | 3             | 0.45                                     | 0.45 | 0.54 | 0.49 |
| Lamb liver | 1             | 0.49                                     | 0.47 | 0.46 | 0.49 |
|            | 2             | 0.48                                     | 0.45 | 0.50 | 0.49 |
|            | 3             | 0.46                                     | 0.47 | 0.50 | 0.49 |
| Pig kidney | 1             | 0.43                                     | 0.51 | 0.45 | 0.56 |
|            | 2             | 0.45                                     | 0.44 | 0.51 | 0.51 |
|            | 3             | 0.49                                     | 0.52 | 0.53 | 0.54 |
| Pig heart  | 1             | 0.41                                     | 0.46 | 0.48 | 0.43 |
|            | 2             | 0.55                                     | 0.46 | 0.46 | 0.49 |
|            | 3             | 0.43                                     | 0.46 | 0.50 | 0.52 |
| Pig lung   | 1             | 0.47                                     | 0.48 | 0.50 | 0.49 |
|            | 2             | 0.45                                     | 0.49 | 0.51 | 0.52 |
|            | 3             | 0.57                                     | 0.45 | 0.53 | 0.48 |

Table S8 The measured values of each element under different substrates at a concentration of 10 µg g<sup>-1</sup>

| Substrate  | Serial number | Measured values (µg g <sup>-1</sup> ) |       |       |       |
|------------|---------------|---------------------------------------|-------|-------|-------|
|            |               | As                                    | Hg    | Tl    | Pb    |
| Pig liver  | 1             | 10.35                                 | 10.01 | 10.41 | 10.89 |
|            | 2             | 10.26                                 | 10.29 | 10.39 | 10.40 |
|            | 3             | 10.34                                 | 8.95  | 10.43 | 10.84 |
| Lamb liver | 1             | 10.46                                 | 9.66  | 10.41 | 10.54 |
|            | 2             | 10.10                                 | 9.74  | 10.61 | 10.56 |
|            | 3             | 10.36                                 | 9.43  | 10.65 | 10.73 |
| Pig kidney | 1             | 10.65                                 | 11.13 | 10.41 | 11.01 |
|            | 2             | 10.52                                 | 10.25 | 10.64 | 10.50 |
|            | 3             | 10.69                                 | 11.09 | 10.72 | 11.29 |
| Pig heart  | 1             | 8.87                                  | 9.78  | 10.31 | 10.35 |
|            | 2             | 10.74                                 | 10.16 | 10.41 | 11.43 |
|            | 3             | 10.71                                 | 9.79  | 10.28 | 11.13 |
| Pig lung   | 1             | 10.45                                 | 10.35 | 10.36 | 10.16 |
|            | 2             | 10.61                                 | 9.37  | 10.57 | 10.66 |
|            | 3             | 10.04                                 | 10.00 | 10.39 | 10.54 |

Table S9 The measured values of each element under different substrates at a concentration of 100 µg g<sup>-1</sup>

1

| Substrate  | Serial number | Measured values (µg g <sup>-1</sup> ) |        |        |        |
|------------|---------------|---------------------------------------|--------|--------|--------|
|            |               | As                                    | Hg     | Tl     | Pb     |
| Pig liver  | 1             | 104.60                                | 102.30 | 104.00 | 102.50 |
|            | 2             | 106.20                                | 102.90 | 103.80 | 105.10 |
|            | 3             | 104.90                                | 104.30 | 104.10 | 105.70 |
| Lamb liver | 1             | 102.20                                | 99.88  | 98.33  | 93.65  |
|            | 2             | 103.50                                | 104.20 | 100.80 | 112.30 |
|            | 3             | 96.63                                 | 99.39  | 99.05  | 115.60 |
| Pig kidney | 1             | 101.50                                | 103.20 | 102.70 | 105.30 |
|            | 2             | 100.30                                | 103.40 | 103.00 | 112.92 |
|            | 3             | 101.30                                | 104.60 | 103.00 | 118.19 |
| Pig heart  | 1             | 109.50                                | 108.10 | 96.92  | 96.07  |
|            | 2             | 98.64                                 | 90.04  | 105.10 | 98.71  |
|            | 3             | 119.96                                | 116.82 | 103.58 | 102.86 |
| Pig lung   | 1             | 103.30                                | 103.62 | 100.40 | 95.10  |
|            | 2             | 101.20                                | 91.26  | 103.50 | 105.20 |
|            | 3             | 99.24                                 | 116.30 | 103.90 | 103.90 |
